# Supplementary material for: Simultaneous Determination of PMS, PDS, and H2O2 Concentrations with Multi-Step Iodometry
Source: MDPI journal article supplement (doi:10.3390/w15122190), 2023-06-10
Supplement: s1 [file s1]

## Supplementary Material

### Simultaneous determination of PMS, PDS and H<sub>2</sub>O<sub>2</sub> concentrations by multi-step iodometric titration

Ming-Xuan Wang<sup>1</sup>, Yue-han Zhou<sup>1</sup>, Song-yu Yang<sup>1</sup>, Xin-xin Jiang<sup>1,\*</sup>, Xue Jiang<sup>1</sup>, Zhen-Xiang Xing<sup>1</sup>,

Ying-hong Guan<sup>1,\*</sup>

<sup>1</sup> School of Water Conservancy and Civil Engineering, Northeast Agricultural University, Harbin,  
150030, China

\* Corresponding author.

Phone numbers: 0086-451-55190286

E-mail address: guanyinghong@neau.edu.cn (Y. H. Guan).

Full postal address: Room 407, Building of Water Conservancy, NO.600 Changjiang Street, Harbin,  
150030, China

**Pages: 9.**

**Figures: 5.**

**Tables: 6.**

#### List

**TEXT S1** Detailed statements on the procedures of multiple-step iodometric determination.

**TEXT S2** General principle and detailed experimental procedure of revised acetate buffered iodometry.

**TEXT S3** General principle and detailed experimental procedure of NaHCO<sub>3</sub> buffered iodometry.

**Figure S1.** PDS concentrations titrated by NaHCO<sub>3</sub> buffered iodometry and molybdate - NaHCO<sub>3</sub> buffered iodometry.

**Figure S2.** PMS concentrations titrated by NaHCO<sub>3</sub> buffered iodometry and molybdate - NaHCO<sub>3</sub> buffered iodometry.

**Figure S3.** Influence of phosphate buffer and catalase on the detection of PDS by molybdate - NaHCO<sub>3</sub>

buffered iodometry.

**Figure S4.** Influence of phosphate buffer and catalase on the detection of PMS by molybdate -  $\text{NaHCO}_3$  buffered iodometry.

**Figure S5.** Influence of phosphate buffer and catalase on the detection of PMS by revised acetate buffered iodometry.

**Table S1** Recovery rates of peroxides in separate solutions by iodometric titration.

**Table S2** Determination of peroxide concentrations in the three peroxide mixtures by the coupling of revised acetate buffered iodometry and  $\text{NaHCO}_3$  buffered iodometry with catalase.

**Table S3.** Levels of factors in orthogonal experiments of molybdate -  $\text{NaHCO}_3$  buffered iodometry.

**Table S4.** Results of orthogonal experiments

**Table S5** The pH values of  $\text{NaHCO}_3$  buffered samples to be titrated by molybdate -  $\text{NaHCO}_3$  buffered iodometry in Step I of multi-step iodometric titration.

**Table S6** Water quality parameters of the real water samples.

**TEXT S1** Detailed statements on the procedures of multiple-step iodometric determination.

Generally, the multiple-step iodometric determination of PMS, PDS, and H<sub>2</sub>O<sub>2</sub> concentrations in their mixed solution included 3 steps. Samples were divided into 3 equivalent parts. In Step I, the first part was treated by NaHCO<sub>3</sub> (with or without molybdate) buffered iodometry to obtain the total concentration of the three peroxides. Solid KI was dissolved in NaHCO<sub>3</sub> solution (6.6 g·L<sup>-1</sup>, with or without molybdate) before PMS, PDS, and H<sub>2</sub>O<sub>2</sub> stock solutions were added in sequence. The solution was then allowed to react for a while (*t*<sub>1</sub>) and then titrated by Na<sub>2</sub>S<sub>2</sub>O<sub>3</sub> (0.01 mol·L<sup>-1</sup>) after adding 3.3% (v/v) acetic acid. In Step II, the second part of mixed solution was treated by catalase and NaHCO<sub>3</sub> (with or without molybdate) buffered iodometry to obtain the sum of PMS and PDS concentrations. PMS, PDS, and H<sub>2</sub>O<sub>2</sub> stock solutions were added in sequence to the solution containing phosphate buffer (composed of 0.39 mmol·L<sup>-1</sup> HPO<sub>4</sub><sup>2-</sup> and 0.70 mmol·L<sup>-1</sup> H<sub>2</sub>PO<sub>4</sub><sup>-</sup>) and catalase 0.01 g·L<sup>-1</sup>. The solution was allowed to remain for 5 min. Then NaHCO<sub>3</sub> solution (with or without molybdate) and solid KI was added. And the following titration process was similar to Step I. In Step III, the third part of mixed solution was treated by catalase and revised acetate buffered iodometry to obtain PMS concentration. PMS, PDS, and H<sub>2</sub>O<sub>2</sub> stock solutions were added in sequence to the solution containing phosphate buffer and catalase, and the solution was allowed for 5 min as Step II. Then 10 g·L<sup>-1</sup> KI and 5 mL acetate buffer (0.98 mol·L<sup>-1</sup> acetic acid and 0.017 mol·L<sup>-1</sup> sodium acetate) were added, the solution was kept for 2 min before titrated by Na<sub>2</sub>S<sub>2</sub>O<sub>3</sub>.

**TEXT S2** General principle and detailed experimental procedure of revised acetate buffered iodometry.

*a. Principle:* PMS reacts with KI under acidic conditions will liberate free iodine from potassium iodide (KI) solutions (Equations S1 and S2) [1]. The liberated iodine is titrated with a standard solution of sodium thiosulfate (Na<sub>2</sub>S<sub>2</sub>O<sub>3</sub>) (Equation S3) with starch as the indicator.

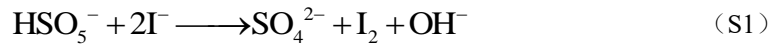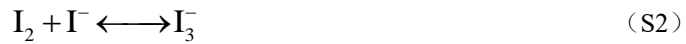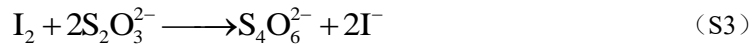

*b. Procedure:* Add appropriate amount of PMS to 100 mL Milli-Q water in the conical flask so that the consumed Na<sub>2</sub>S<sub>2</sub>O<sub>3</sub> (0.01 mol·L<sup>-1</sup>) will be no more than 20 mL and no less than 0.2 mL for the starch-iodide end point. Add 1 g KI and 5 mL acetic acid buffer (0.98 mol·L<sup>-1</sup> acetic acid and 0.017 mol·L<sup>-1</sup> sodium acetate). The solutions were allowed to stand for 2 min, and then titrated with Na<sub>2</sub>S<sub>2</sub>O<sub>3</sub> (0.01 mol·L<sup>-1</sup>) until the yellow color of the liberated iodine almost is discharged. Add 1 mL of 0.5% (w/v) starch indicator solution and titrate until blue color is discharged. Denote the consumed Na<sub>2</sub>S<sub>2</sub>O<sub>3</sub> volume after correction by blank titration as *V*. The concentration of PMS solution was calculated according to

equation S4.

$$c_{PMS} = \frac{c_{Na_2S_2O_3} \times V}{2 \times 100} \quad (S4)$$

Where  $c_{PMS}$  is the PMS concentration in 100 mL solution,  $\text{mol}\cdot\text{L}^{-1}$ ;  $c_{Na_2S_2O_3}$  is the concentration of  $\text{Na}_2\text{S}_2\text{O}_3$ ,  $\text{mol}\cdot\text{L}^{-1}$ ; and  $V$  is the consumed  $\text{Na}_2\text{S}_2\text{O}_3$  volume after correction by blank titration, mL.

**TEXT S3** General principle and detailed experimental procedure of  $\text{NaHCO}_3$  buffered iodometry.

*a. Principle:* Free iodine is released during the reaction of PDS with KI in the presence of  $\text{NaHCO}_3$  (Equations S2 and S5) [2]. The liberated iodine is titrated with a standard solution of sodium thiosulfate ( $\text{Na}_2\text{S}_2\text{O}_3$ ) with starch as the indicator (Equation S3), and the concentration of PDS in the solution was calculated based on the volume of titrant consumed.

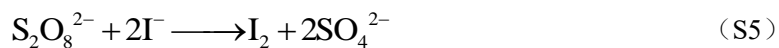

*b. Procedure:* Add the appropriate amount of PDS to 100 mL Milli-Q water so that the consumed  $\text{Na}_2\text{S}_2\text{O}_3$  ( $0.01 \text{ mol}\cdot\text{L}^{-1}$ ) will be no more than 20 mL and no less than 0.2 mL for the starch-iodide end point. Add 13.2g of KI and 0.66 g of  $\text{NaHCO}_3$  to solution. The solution was allowed to stand for 15 min before adding 3.3 mL ( $v/v=3.3\%$ ) of acetic acid. Then titrate the solution with  $\text{Na}_2\text{S}_2\text{O}_3$  ( $0.01 \text{ mol}\cdot\text{L}^{-1}$ ) until the yellow color of the liberated iodine almost is discharged. Add 1 mL of 0.5% ( $w/v$ ) starch indicator solution and titrate until blue color is discharged. Denote the consumed  $\text{Na}_2\text{S}_2\text{O}_3$  volume after correction by blank titration as  $V$ . The concentration of PDS solution was calculated according to equation S6.

$$c_{PDS} = \frac{c_{Na_2S_2O_3} \times V}{2 \times 100} \quad (S6)$$

Where  $c_{PDS}$  is the PDS concentration in 100 mL solution,  $\text{mol}\cdot\text{L}^{-1}$ ;  $c_{Na_2S_2O_3}$  is the concentration of  $\text{Na}_2\text{S}_2\text{O}_3$ ,  $\text{mol}\cdot\text{L}^{-1}$ ; and  $V$  is the consumed  $\text{Na}_2\text{S}_2\text{O}_3$  volume after correction by blank titration, mL.

## Figures

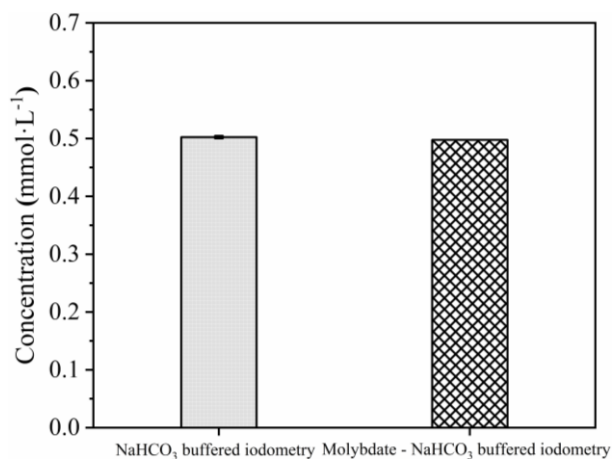

**Figure S1.** PDS concentrations titrated by NaHCO<sub>3</sub> buffered iodometry and molybdate - NaHCO<sub>3</sub> buffered iodometry. Conditions: [PDS]= 0.502 mmol·L<sup>-1</sup>, [KI]=132 g·L<sup>-1</sup>,  $t_1$  =15 min, [(NH<sub>4</sub>)<sub>6</sub>Mo<sub>7</sub>O<sub>24</sub>·4H<sub>2</sub>O] =26.09 mg·L<sup>-1</sup>.

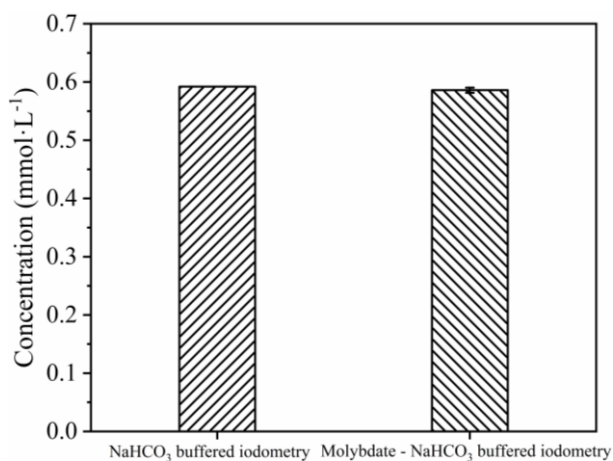

**Figure S2.** PMS concentrations titrated by NaHCO<sub>3</sub> buffered iodometry and molybdate - NaHCO<sub>3</sub> buffered iodometry. Conditions: [PMS]=0.592 mmol·L<sup>-1</sup>, [KI]=132 g·L<sup>-1</sup>,  $t_1$  =15 min, [(NH<sub>4</sub>)<sub>6</sub>Mo<sub>7</sub>O<sub>24</sub>·4H<sub>2</sub>O] =26.09 mg·L<sup>-1</sup>.

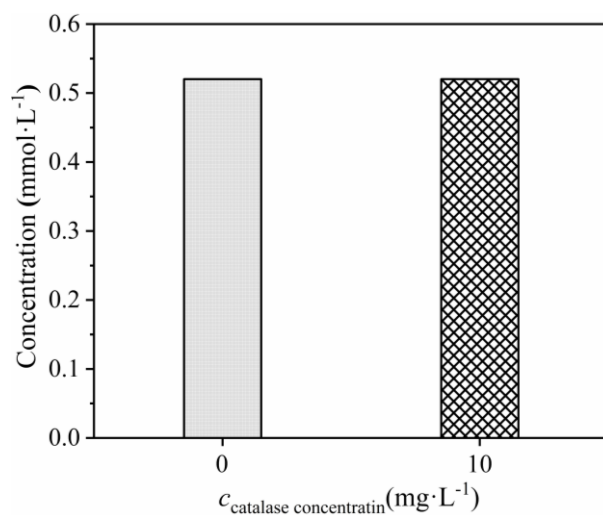

**Figure S3.** Influence of phosphate buffer and catalase on the detection of PDS by molybdate -  $\text{NaHCO}_3$  buffered iodometry. Conditions:  $[\text{PDS}] = 0.52 \text{ mmol} \cdot \text{L}^{-1}$ ,  $[\text{KI}] = 132 \text{ g} \cdot \text{L}^{-1}$ ,  $[(\text{NH}_4)_6\text{Mo}_7\text{O}_{24} \cdot 4\text{H}_2\text{O}] = 26.09 \text{ mg} \cdot \text{L}^{-1}$ ,  $t_1 = 15 \text{ min}$ , phosphate buffer =  $1.1 \text{ mmol} \cdot \text{L}^{-1}$ .

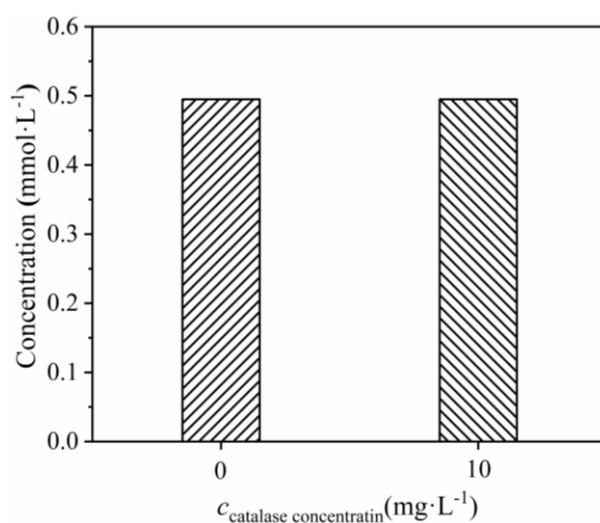

**Figure S4.** Influence of phosphate buffer and catalase on the detection of PMS by molybdate -  $\text{NaHCO}_3$  buffered iodometry. Conditions:  $[\text{PMS}] = 0.495 \text{ mmol} \cdot \text{L}^{-1}$ ,  $[\text{KI}] = 132 \text{ g} \cdot \text{L}^{-1}$ ,  $[(\text{NH}_4)_6\text{Mo}_7\text{O}_{24} \cdot 4\text{H}_2\text{O}] = 26.09 \text{ mg} \cdot \text{L}^{-1}$ ,  $t_1 = 15 \text{ min}$ , phosphate buffer =  $1.1 \text{ mmol} \cdot \text{L}^{-1}$ .

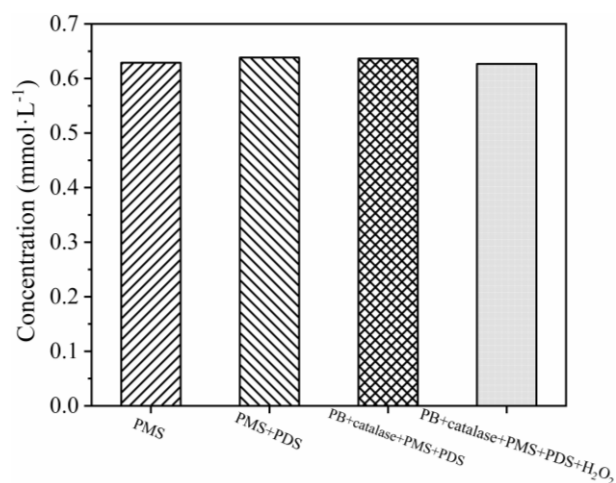

**Figure S5.** Influence of phosphate buffer and catalase on the detection of PMS by revised acetate buffered iodometry. Conditions: [PMS]=0.629 mmol·L<sup>-1</sup>, [PDS]=0.500 mmol·L<sup>-1</sup>, [H<sub>2</sub>O<sub>2</sub>]=0.634 mmol·L<sup>-1</sup>, [catalase]= 10 mg·L<sup>-1</sup>, phosphate buffer= 1.1 mmol·L<sup>-1</sup>.

## Tables

**Table S1** Recovery rates of peroxides in separate solutions by iodometric titration.

| Method                                | H <sub>2</sub> O <sub>2</sub>                     |                   |                        | PDS                                               |                   |                        | PMS                                               |                   |                        |
|---------------------------------------|---------------------------------------------------|-------------------|------------------------|---------------------------------------------------|-------------------|------------------------|---------------------------------------------------|-------------------|------------------------|
|                                       | Theoretical concentration (mmol·L <sup>-1</sup> ) | Recovery rate (%) | Standard deviation (%) | Theoretical concentration (mmol·L <sup>-1</sup> ) | Recovery rate (%) | Standard deviation (%) | Theoretical concentration (mmol·L <sup>-1</sup> ) | Recovery rate (%) | Standard deviation (%) |
| NaHCO <sub>3</sub> buffered iodometry | 0.62                                              | 87.03             | 3.66                   | 1.01                                              | 100               | 0                      | 1.30                                              | 102.38            | 0                      |
| Revised acetate buffered iodometry    | NA                                                | NA                | NA                     | 1.01                                              | 1.34              | 0.09                   | 1.26                                              | 99.44             | 0                      |

Note: NA means that the value cannot be determined accurately.

**Table S2** Determination of peroxide concentrations in the three peroxide mixtures by the combination of revised acetate buffered iodometry and  $\text{NaHCO}_3$  buffered iodometry with catalase.

| Scenarios | $\text{H}_2\text{O}_2$                                        |                   |                        | PDS                                                           |                   |                        | PMS                                                           |                   |                        |
|-----------|---------------------------------------------------------------|-------------------|------------------------|---------------------------------------------------------------|-------------------|------------------------|---------------------------------------------------------------|-------------------|------------------------|
|           | Theoretical concentration ( $\text{mmol}\cdot\text{L}^{-1}$ ) | Recovery rate (%) | Standard deviation (%) | Theoretical concentration ( $\text{mmol}\cdot\text{L}^{-1}$ ) | Recovery rate (%) | Standard deviation (%) | Theoretical concentration ( $\text{mmol}\cdot\text{L}^{-1}$ ) | Recovery rate (%) | Standard deviation (%) |
| 1         | 0.634                                                         | 27.43             | 0.34                   | 0.500                                                         | 99.31             | 0                      | 0.630                                                         | 99.82             | 0.30                   |
| 2         | 0.186                                                         | 30.00             | 0                      | 0.196                                                         | 98.73             | 0.52                   | 0.177                                                         | 100.00            | 0.03                   |

**Table S3.** Levels of factors in orthogonal experiments of molybdate -  $\text{NaHCO}_3$  buffered iodometry.

| Levels | Factors                                    |                                                                                                                    |            |
|--------|--------------------------------------------|--------------------------------------------------------------------------------------------------------------------|------------|
|        | KI dosage ( $\text{g}\cdot\text{L}^{-1}$ ) | $(\text{NH}_4)_6\text{Mo}_7\text{O}_{24}\cdot 4\text{H}_2\text{O}$ concentration ( $\text{mg}\cdot\text{L}^{-1}$ ) | Time (min) |
| 1      | 10                                         | 0                                                                                                                  | 5          |
| 2      | 60                                         | 26.09                                                                                                              | 15         |
| 3      | 132                                        | 46.15                                                                                                              | 30         |

**Table S4.** Results of orthogonal experiments.

| Serial number | KI ( $\text{g}\cdot\text{L}^{-1}$ ) | $(\text{NH}_4)_6\text{Mo}_7\text{O}_{24}\cdot 4\text{H}_2\text{O}$ ( $\text{mg}\cdot\text{L}^{-1}$ ) | Time (min) | $\text{H}_2\text{O}_2$ detection rate (%) |
|---------------|-------------------------------------|------------------------------------------------------------------------------------------------------|------------|-------------------------------------------|
| 1             | 10                                  | 0                                                                                                    | 5          | 0                                         |
| 2             | 10                                  | 26.09                                                                                                | 15         | 0                                         |
| 3             | 10                                  | 46.15                                                                                                | 30         | 0                                         |
| 4             | 60                                  | 0                                                                                                    | 15         | 25.42                                     |
| 5             | 60                                  | 26.09                                                                                                | 30         | 80.63                                     |
| 6             | 60                                  | 46.15                                                                                                | 5          | 65.37                                     |
| 7             | 132                                 | 0                                                                                                    | 30         | 30.00                                     |
| 8             | 132                                 | 26.09                                                                                                | 5          | 92.36                                     |
| 9             | 132                                 | 46.15                                                                                                | 15         | 94.76                                     |
| $k_1$         | 0                                   | 55.42                                                                                                | 157.73     |                                           |
| $k_2$         | 171.42                              | 172.99                                                                                               | 120.18     |                                           |
| $k_3$         | 217.12                              | 160.13                                                                                               | 110.63     |                                           |
| R             | 72.37                               | 39.19                                                                                                | 15.70      |                                           |



**Table S5** The pH values of NaHCO<sub>3</sub> buffered samples to be titrated by molybdate - NaHCO<sub>3</sub> buffered iodometry in Step I of multi-step iodometric titration.

| Scenarios | Ca <sup>2+</sup> (mg·L <sup>-1</sup> ) | Mg <sup>2+</sup> (mg·L <sup>-1</sup> ) | Na <sub>2</sub> CO <sub>3</sub> (g·L <sup>-1</sup> ) | peroxide concentration (μmol·L <sup>-1</sup> ) |     |                               | pH   |
|-----------|----------------------------------------|----------------------------------------|------------------------------------------------------|------------------------------------------------|-----|-------------------------------|------|
|           |                                        |                                        |                                                      | PMS                                            | PDS | H <sub>2</sub> O <sub>2</sub> |      |
| 1         | 0                                      | 0                                      | 0                                                    | 166                                            | 177 | 222                           | 8.35 |
| 2         | 100                                    | 0                                      | 0                                                    | 166                                            | 177 | 222                           | 8.03 |
| 3         | 100                                    | 0                                      | 1.06                                                 | 166                                            | 177 | 222                           | 8.59 |
| 4         | 0                                      | 100                                    | 0                                                    | 166                                            | 177 | 222                           | 8.22 |
| 5         | 0                                      | 100                                    | 1.06                                                 | 166                                            | 177 | 222                           | 8.83 |

**Table S6** Water quality parameters of the real water samples.

| Sample        | Cl <sup>-</sup><br>(mg·L <sup>-1</sup> ) | F <sup>-</sup><br>(mg·L <sup>-1</sup> ) | NO <sub>3</sub> <sup>-</sup><br>(mg·L <sup>-1</sup> ) | SO <sub>4</sub> <sup>2-</sup><br>(mg·L <sup>-1</sup> ) | TOC<br>(mg·L <sup>-1</sup> ) | pH   | Hardness<br>(as CaCO <sub>3</sub> , mg·L <sup>-1</sup> ) | UV <sub>254</sub> |
|---------------|------------------------------------------|-----------------------------------------|-------------------------------------------------------|--------------------------------------------------------|------------------------------|------|----------------------------------------------------------|-------------------|
| Tap water     | 9.70                                     | 0.03                                    | 4.03                                                  | 10.91                                                  | 3.52                         | 7.29 | 29.03                                                    | 0.021             |
| Surface water | 21.10                                    | 0.39                                    | 7.82                                                  | 29.38                                                  | 6.80                         | 7.20 | 126.13                                                   | 0.150             |
| Groundwater   | 1.75                                     | 0.11                                    | 0.93                                                  | 10.60                                                  | 12.04                        | 8.56 | 384.38                                                   | 0.035             |

## References

1. Gupta, Y. K. Iodometric determination of persulphate in sulphuric acid solution. *Fresenius' Journal of Analytical Chemistry* 1961, 180(4): 260-265.
2. Liang, C., Huang, C.-F., Mohanty, N., Kurakalva, R.M. A rapid spectrophotometric determination of persulfate anion in ISCO. *Chemosphere* 2008, 73, 1540-1543.
